# Supplementary material for: Antitumor Activity of an Anti-EGFR/HER2 Bispecific Antibody in a Mouse Xenograft Model of Canine Osteosarcoma
Source: MDPI journal article supplement (doi:10.3390/pharmaceutics14112494), 2022-11-17
Supplement: s1 [file s1]

## Supplementary Figures

### Antitumor Activity of an Anti-EGFR/HER2 Bispecific Antibody in a Mouse Xenograft Model of Canine Osteosarcoma

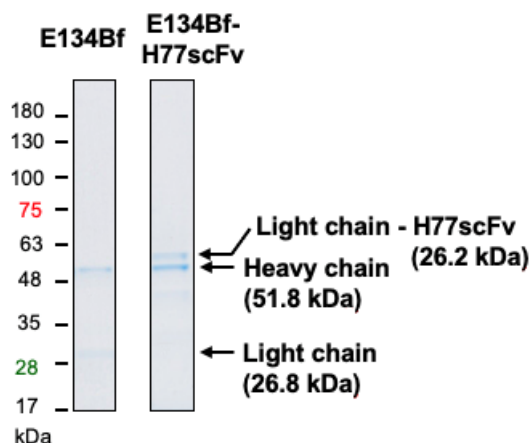

**Supplementary Figure S1.** Purity of E134Bf-H77scFv. E134Bf (0.5  $\mu$ g) and E134Bf-H77scFv (0.5  $\mu$ g) were denatured by sodium dodecyl sulfate (SDS) sample buffer (Nacalai Tesque, Inc.). Proteins were separated on 5%–20% polyacrylamide gel (FUJIFILM Wako). The gel was stained by Bio-Safe CBB G-250 Stain (Bio-Rad Laboratories, Inc.).

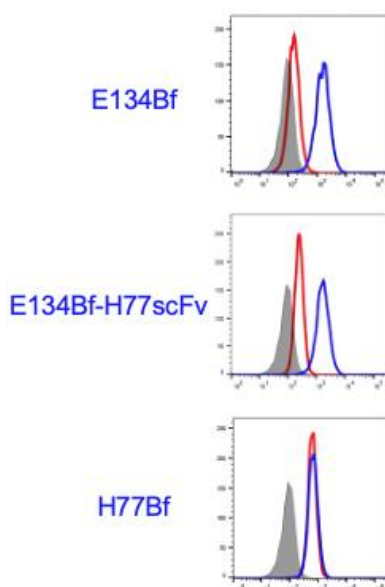

**Supplementary Figure S2.** Flow cytometry using the EGFR peptide containing E134Bf epitope. E134Bf (1  $\mu$ g/ml), E134Bf-H77scFv (1  $\mu$ g/ml), and each mAb plus the EGFR peptide (aa 375-394, 30  $\mu$ g/ml) [44], or control (blocking buffer) were reacted with D-17 cells for 30 min at 4°C, followed by treatment with Alexa Fluor 488-conjugated anti-dog IgG. Fluorescence data were analyzed using the SA3800 Cell Analyzer (Sony Corp.). Blue lines; each mAb, red lines; each mAb + EGFR peptide (aa 375-394), filled gray; control.
